# Supplementary material
Source: Springer Nature journal article supplement (https://www.springermedizin.de/resource/supplementary/12878_2012_6_MOESM2_ESM.pdf/9686336)
Supplement: MOESM2 [file 9686336]

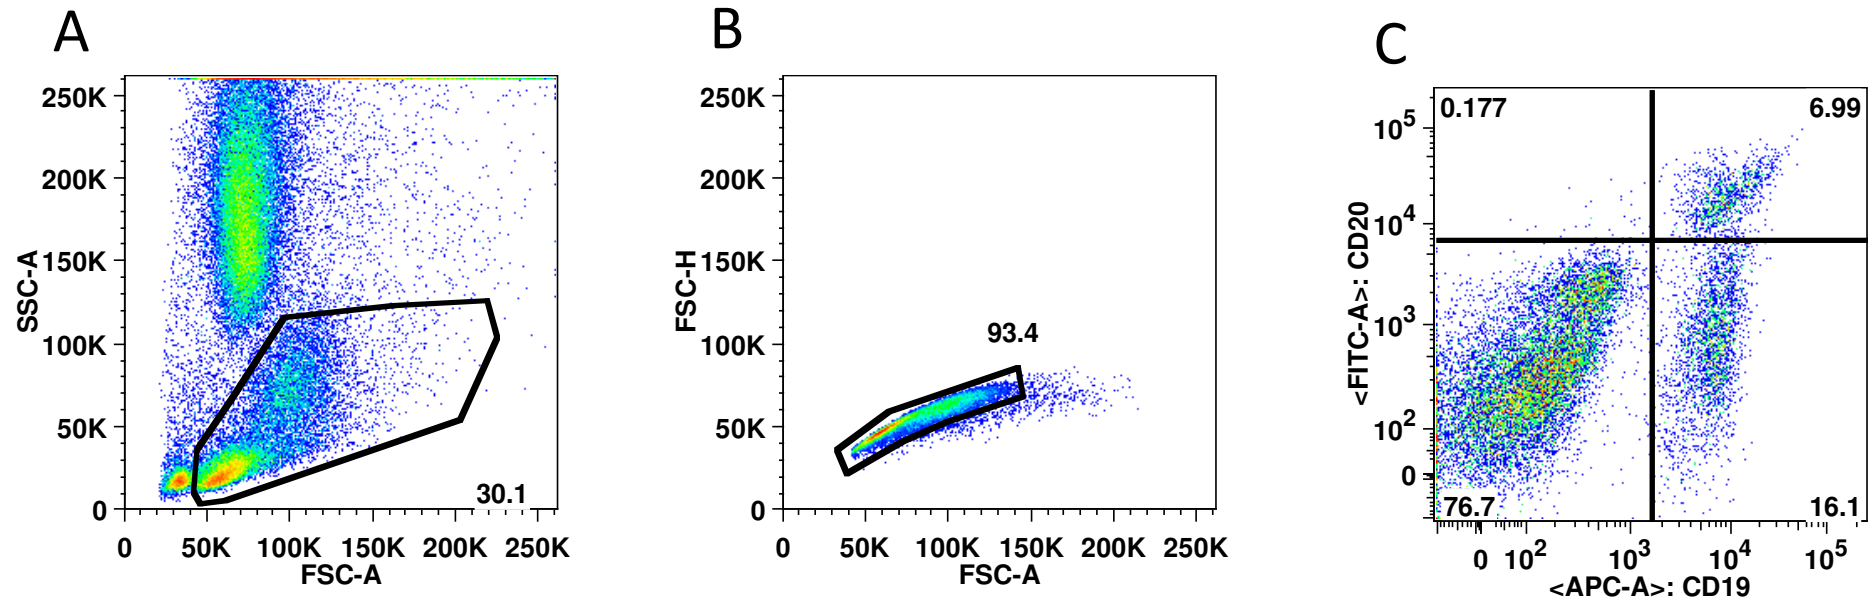

**Supplementary Fig. 1.** Flow cytometry plots of the bone marrow. A) Forward- and side scatter plot of the bone marrow, crude gate excluding dead cells and granulocytes. B) Doublet exclusion in a forward scatter area versus forward scatter height plot. C) CD19 APC versus CD20 FITC.
